# Supplementary material for: Cellulose-to-HMF conversion using crystalline mesoporous titania and zirconia nanocatalysts in ionic liquid systems
Source: Royal Society of Chemistry journal article supplement (doi:10.1039/c2ra21805d), 2012-11-29
Supplement: c2ra21805d.pdf [file c2ra21805d.pdf]

**Figure S1**

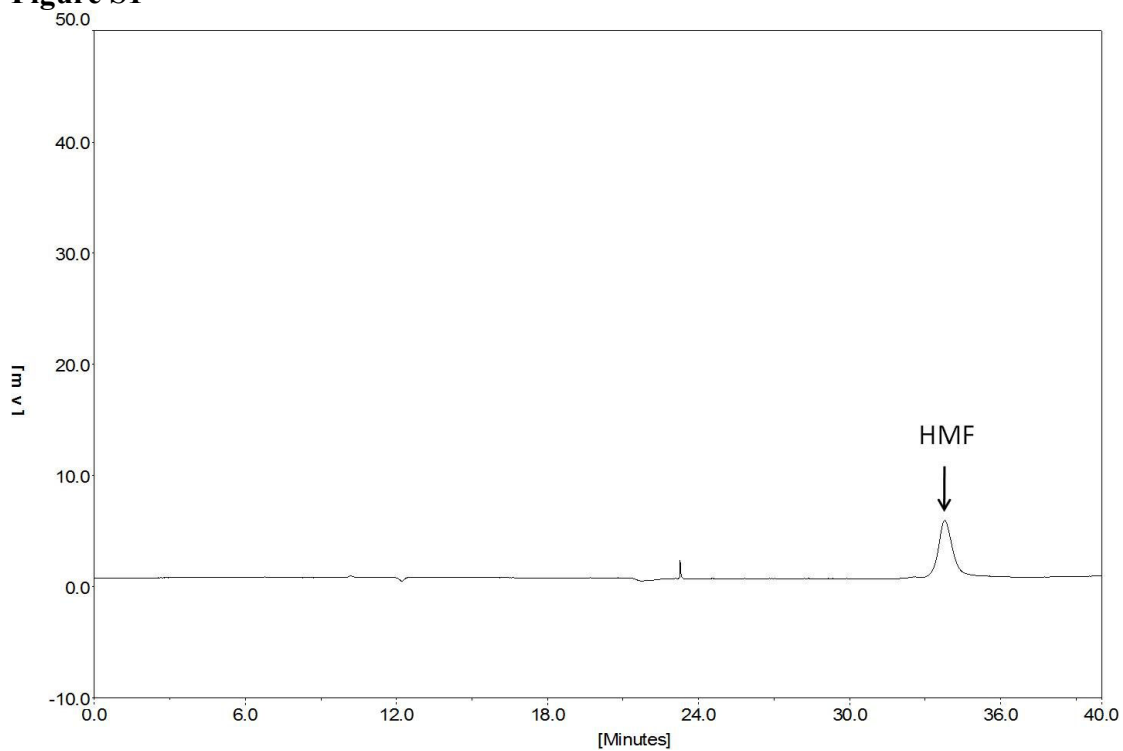

**Figure S1.** A typical HPLC spectrum of HMF standard. The position of the HMF peak is located at 33.76 min.

**Figure S2**

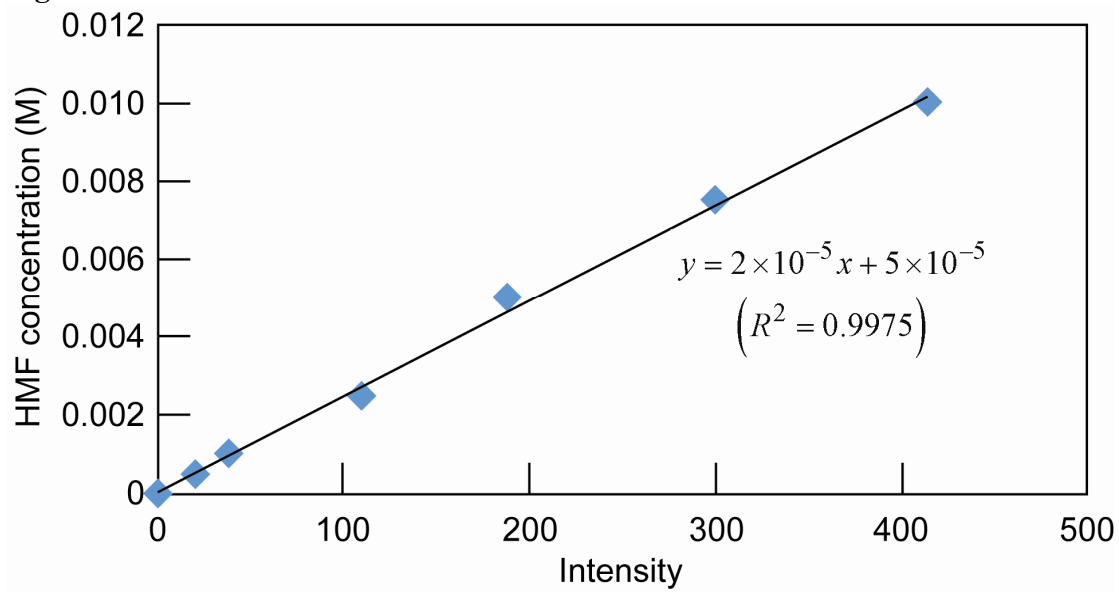

**Figure S2.** A calibration curve of HMF.

**Figure S3**

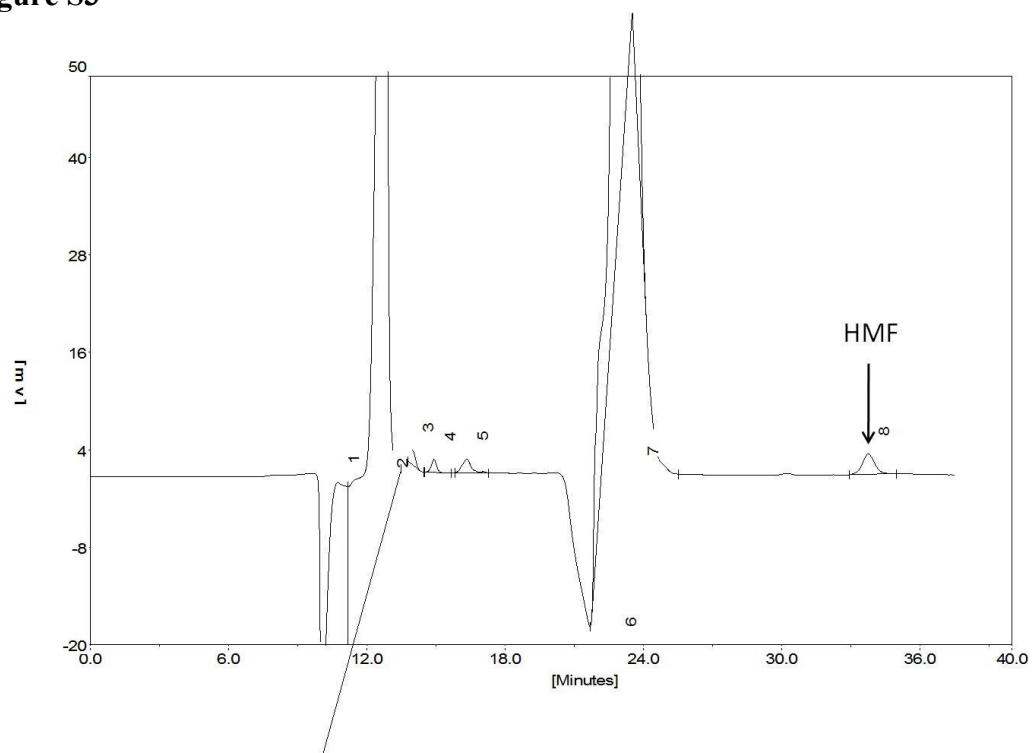

**Figure S3.** A HPLC spectrum for one of our final products.

**The calculation of the HMF yield in our system:**

Calibration curve (Figure S2):  $y = 2 \times 10^{-5}x + 5 \times 10^{-5}$

HMF intensity (Figure S3): 94.33mV

$$\therefore \text{HMF concentration} = 5 \times (2 \times 10^{-5} \times 94.33 + 5 \times 10^{-5}) = 0.009683M$$

(Because we diluted our liquid product 5 times before the HPLC analysis, the real concentration of HMF in our liquid product needs to be adjusted by multiplying 5.)

$$\therefore \text{HMF amount in our liquid product} = 0.009683 \times 0.002 = 1.9366 \times 10^{-5} \text{ mol}$$

(The volume of our liquid is 2 mL)

Cellulose: 0.0151g  $\Rightarrow 9.26 \times 10^{-5} \text{ mol}$  based on glucose unit

$$\therefore \text{HMF yield} = 1.9366 \times 10^{-5} \text{ mol} / 9.26 \times 10^{-5} \text{ mol} = 20.78\%$$

Figure S4

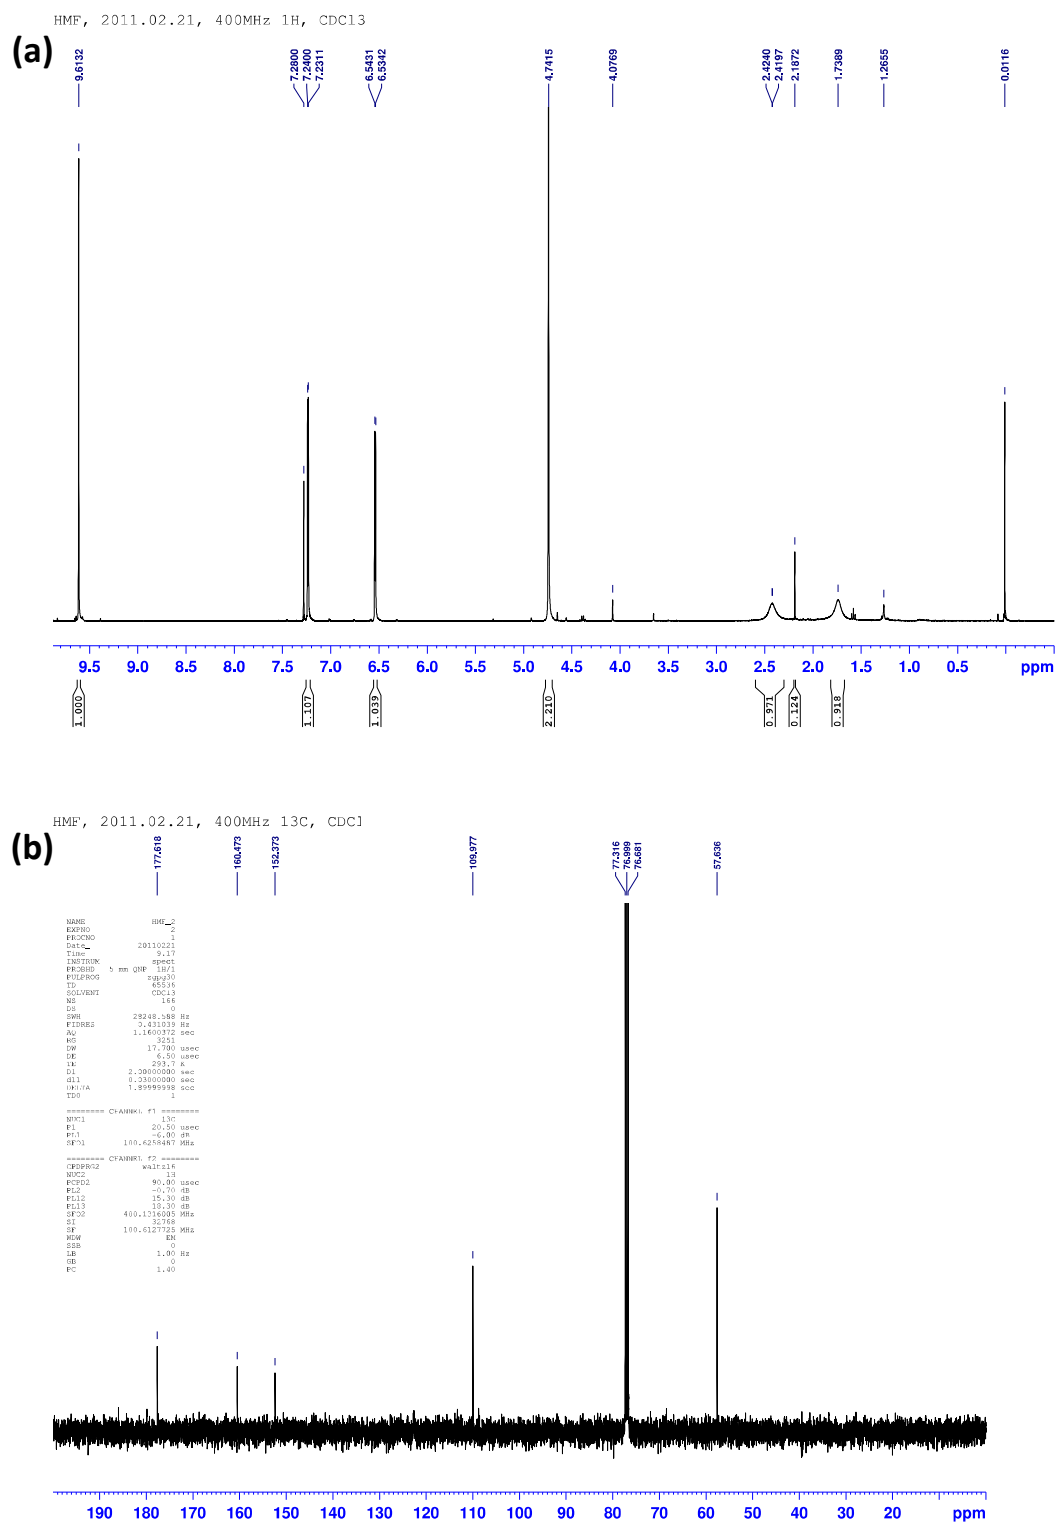

Figure S4. (a) <sup>1</sup>H and (b) <sup>13</sup>C NMR spectra of HMF standard in CDCl<sub>3</sub>.

Figure S5

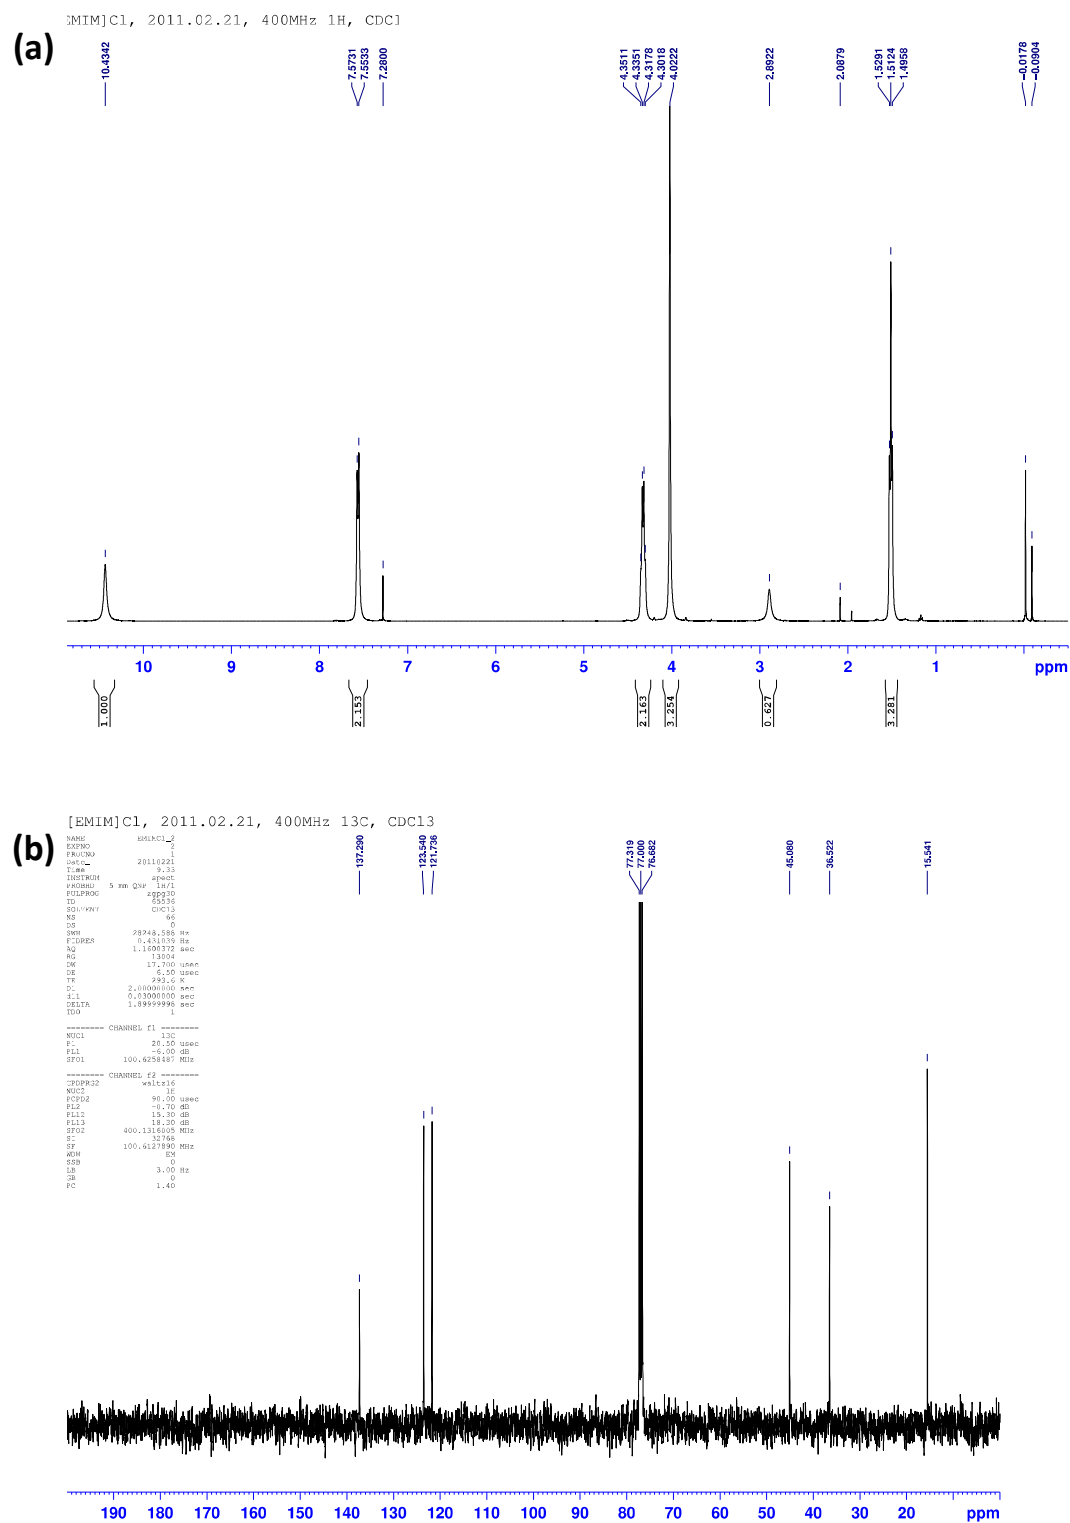

Figure S5. (a) <sup>1</sup>H and (b) <sup>13</sup>C NMR spectra of [EMIM]Cl standard in CDCl<sub>3</sub>.

Figure S6

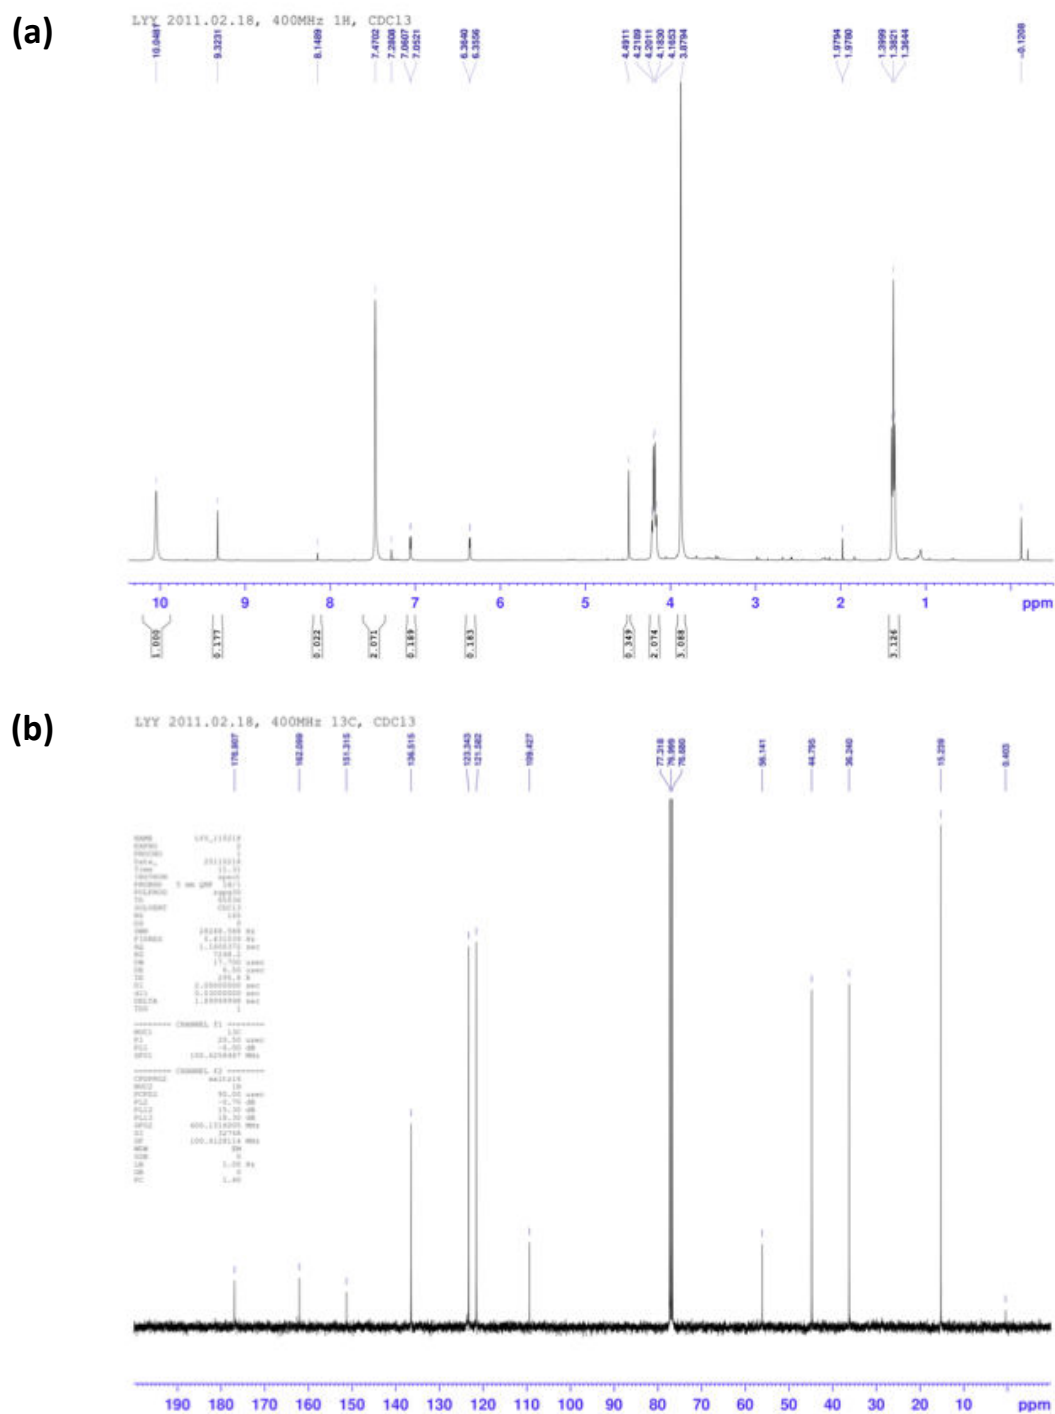

Figure S6. (a) <sup>1</sup>H and (b) <sup>13</sup>C NMR spectra of our product standard in CDCl<sub>3</sub>.

**Figure S7**

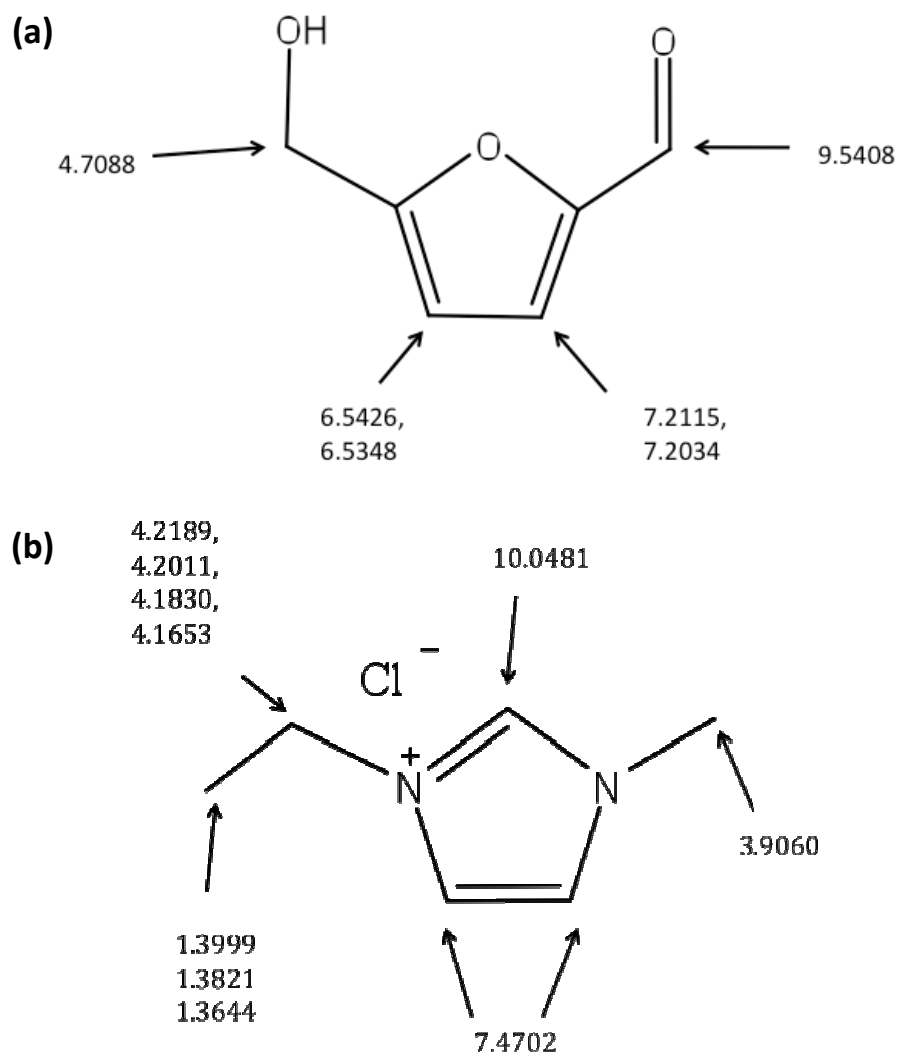

**Figure S7.** Peak positions and the corresponding chemical structures of (a) HMF and (b) [EMIM]Cl in  $^1\text{H}$  NMR spectrum.



**Figure S8**

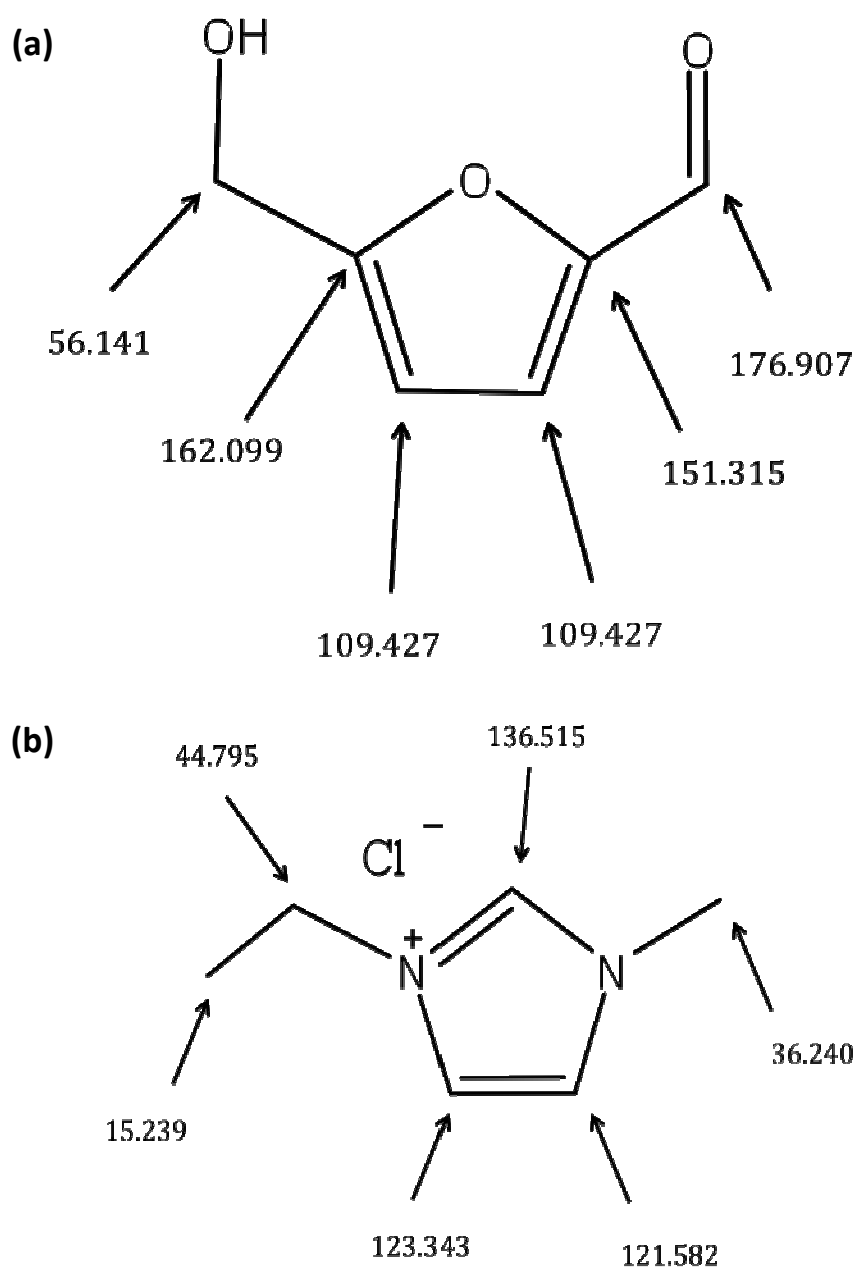

**Figure S8.** Peak positions and the corresponding chemical structures of (a) HMF and (b) [EMIM]Cl in  $^{13}\text{C}$  NMR spectrum.

**Figure S9**

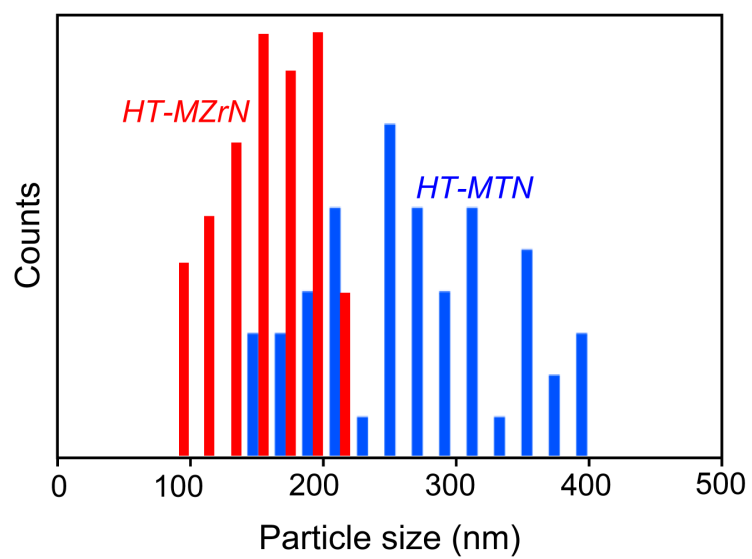

**Figure S9.** Particle size distribution of hydrothermally treated MTN (HT-MTN) and MZrN (HT-MZrN).

**Figure S10**

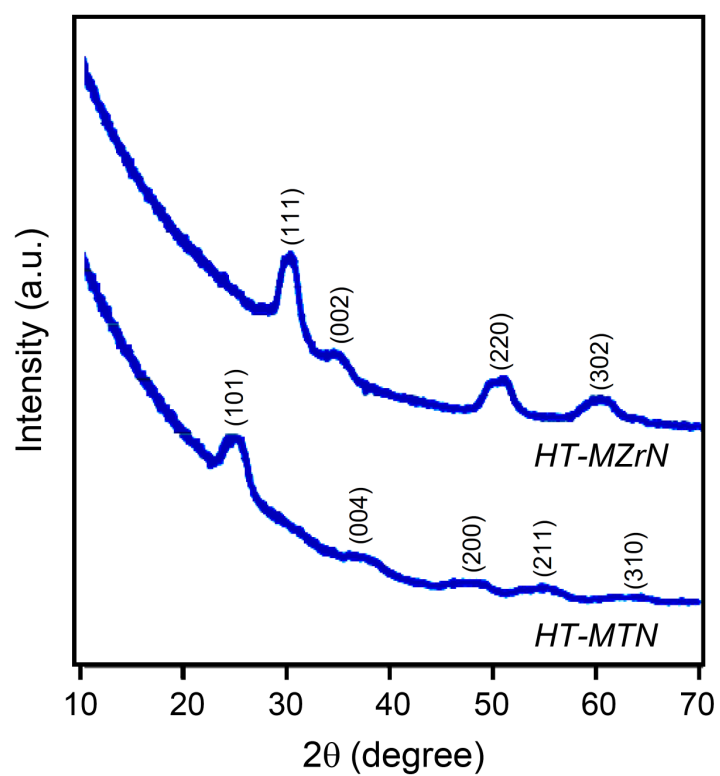

**Figure S10.** XRD patterns of hydrothermally treated MTN (HT-MTN) and MZrN (HT-MZrN).

**Figure S11**

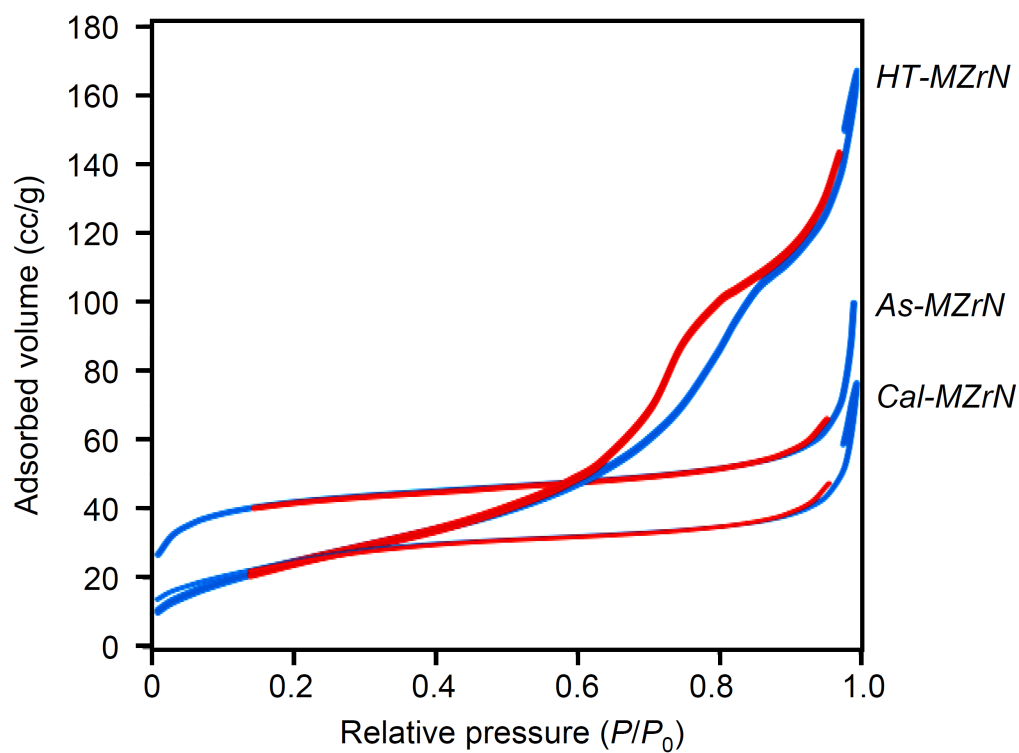

**Figure S11.** Nitrogen adsorption-desorption isotherms of amorphous MZrN (MZrN), hydrothermally treated MZrN (HT-MZrN), and calcined MZrN (Cal-MZrN).

**Table S1.** Summary of structural and acidic properties of HT-MTN and commercialized titania P25.

| Sample | Particle size (nm) | Pore size (nm) | Surface area (m <sup>2</sup> /g) | Crystalline phase            | Acidic strength (°C) | Acidic amount (mmol/g) | Yield of glucose (%) | Yield of HMF (%) | Total yield (%) |
|--------|--------------------|----------------|----------------------------------|------------------------------|----------------------|------------------------|----------------------|------------------|-----------------|
| HT-MTN | 257.3              | 11.0           | 53.0                             | Anatase                      | 290                  | 1.924                  | 12.9                 | 18.2             | 31.0            |
| P25    | 25.0               | N/A            | 49.3                             | Anatase (80%) + Rutile (20%) | 280                  | 1.520                  | 8.30                 | 12.6             | 20.9            |
